# Supplementary material for: Improved Drought Characteristics in the Pearl River Basin Based on Reconstructed GRACE Solution with Enhanced Temporal Resolution
Source: MDPI journal article supplement (doi:10.3390/rs15194849), 2023-10-07
Supplement: s1 [file s1]

# Supplementary material to “Improved Drought Characteristics in the Pearl River Basin Based on Reconstructed GRACE Solution with Enhanced Temporal Resolution”

Linju Wang <sup>1,2</sup>, Menglin Zhang <sup>3</sup>, Wenjie Yin <sup>4</sup>, Yi Li <sup>1,2,\*</sup>, Litang Hu <sup>5</sup> and Linlin Fan <sup>6</sup>

<sup>1</sup> School of Civil Engineering, Architecture and Environment, Hubei University of Technology, Wuhan 430068, China

<sup>2</sup> Key Laboratory of Intelligent Health Perception and Ecological Restoration of Rivers and Lakes, Ministry of Education, Hubei University of Technology, Wuhan 430068, China

<sup>3</sup> Beijing Water Science and Technology Institute, Beijing 100048, China

<sup>4</sup> Satellite Application Center for Ecology and Environment, Ministry of Ecology and Environment (MEE), Beijing 100094, China

<sup>5</sup> College of water sciences, Beijing Normal University, Beijing 100091, China

<sup>6</sup> Changjiang River Scientific Research Institute, Wuhan 430010, China

\* Correspondence: liyi\_bnuphd@mail.bnu.edu.cn

Supplementary Figures S1 showing spatial distribution of mean and maximum precipitation in the Pearl River basin. The average of rainfall can reflect the drought situation in the Pearl River basin. The maximum rainfall can reflect the possible flood situation in the Pearl River basin.

Supplementary Figures S2 showing the CC between different daily TWSA products and CSR-TWSA. Here, each daily TWSA product average into the monthly scale that is consistent with the GRACE “month”.

Supplementary Tables S1 highlighting the characteristics of SPI-6-identified drought events. The drought characteristics monitored by different drought indexes are conducive to a more comprehensive understanding of a drought event.

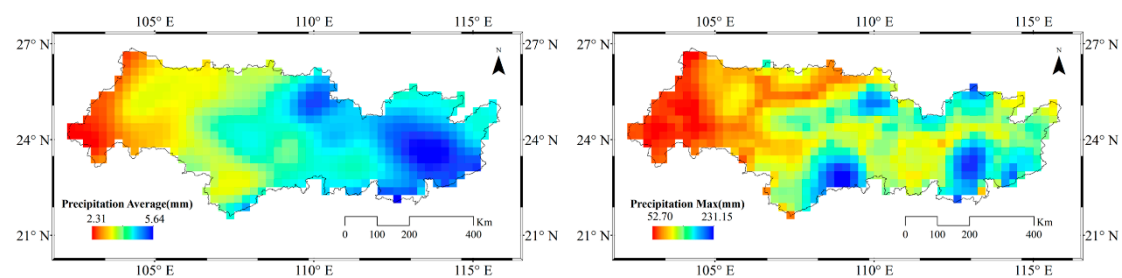

**Figure S1.** Spatial distribution of mean and maximum precipitation in the Pearl River basin

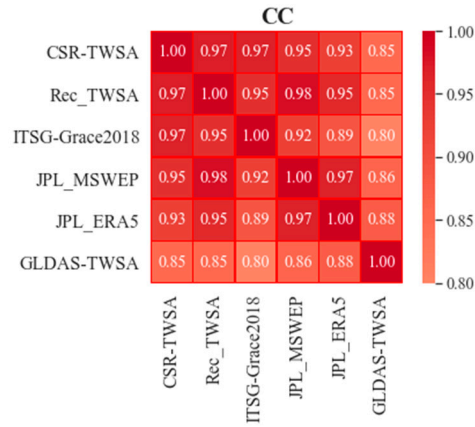

**Figure S2.** CC between different daily TWSA products and CSR-TWSA

**Table S1.** Statistics of SPI-6-identified drought events

| ID | Duration             | Duration<br>(days) | Total<br>severity | Minimum<br>SPI-6(Category) | Minimum<br>SPI-6 date |
|----|----------------------|--------------------|-------------------|----------------------------|-----------------------|
| 1  | 2003/9/18- 2004/4/16 | 211                | -178.24           | -1.33(D2)                  | 2003/12/26            |
| 2  | 2005/1/1- 2005/4/24  | 114                | -144.81           | -1.74(D3)                  | 2005/2/27             |
| 3  | 2005/12/3- 2006/3/12 | 100                | -107.21           | -1.50(D2)                  | 2005/12/25            |
| 4  | 2009/8/20- 2010/4/30 | 254                | -280.37           | -1.64(D3)                  | 2010/1/1              |
| 5  | 2011/5/27- 2012/1/23 | 242                | -328.03           | -2.13(D4)                  | 2011/9/17             |
| 6  | 2021/6/6- 2021/12/15 | 193                | -175.52           | -1.31(D2)                  | 2021/9/12             |
